# Supplementary material for: A failed attempt at developing a search filter for systematic review methodology articles in Ovid Embase
Source: PubMed Central journal article supplement (PMC6466493; doi:10.5195/jmla.2019.519), 2019-04-01
Supplement: jmla-107-203-s001.pdf [file jmla-107-203-s001.pdf]

## A failed attempt at developing a search filter for systematic review methodology articles in Ovid Embase

Christine Neilson, AHIP; Mê-Linh Lê, AHIP

### APPENDIX

#### Tables 1–3 VOSViewer twenty most common terms

**Table 1** The twenty most common terms located in the subject heading field, as identified by VOSViewer software

| Frequency range | Term                                                                                                                                                                                               | (Count) | Term                                                                                                                                                                                  | (Count) |
|-----------------|----------------------------------------------------------------------------------------------------------------------------------------------------------------------------------------------------|---------|---------------------------------------------------------------------------------------------------------------------------------------------------------------------------------------|---------|
| 1–5             |                                                                                                                                                                                                    | –       |                                                                                                                                                                                       |         |
| 6–10            | <ul style="list-style-type: none"> <li>• analysis of variance (9)</li> <li>• analytic method (9)</li> <li>• clinical practice guidelines (10)</li> <li>• comparative effectiveness (10)</li> </ul> |         | <ul style="list-style-type: none"> <li>• comparative effectiveness research (9)</li> <li>• evidence-based medicine (10)</li> <li>• grade (10)</li> <li>• heterogeneity (9)</li> </ul> |         |
| 11–15           | <ul style="list-style-type: none"> <li>• access to information (13)</li> <li>• algorithm (15)</li> <li>• clinical research (13)</li> </ul>                                                         |         | <ul style="list-style-type: none"> <li>• decision making (11)</li> <li>• human (13)</li> </ul>                                                                                        |         |
| 16–20           | <ul style="list-style-type: none"> <li>• accuracy (19)</li> <li>• adult (19)</li> <li>• clinical trial (19)</li> </ul>                                                                             |         | <ul style="list-style-type: none"> <li>• clinical trial (19)</li> <li>• meta-analysis (17)</li> </ul>                                                                                 |         |
| 21–25           |                                                                                                                                                                                                    | –       |                                                                                                                                                                                       |         |
| 26–30           |                                                                                                                                                                                                    | –       |                                                                                                                                                                                       |         |
| 31–35           | bias                                                                                                                                                                                               | (34)    |                                                                                                                                                                                       |         |
| 36–40           |                                                                                                                                                                                                    | –       |                                                                                                                                                                                       |         |
| 41+             | article                                                                                                                                                                                            | (267)   |                                                                                                                                                                                       |         |

Note: Candidate terms, as-yet unstandardized descriptors that may one day become subject headings, are indexed in the Ovid Embase Subject Heading Field.

**Table 2** The twenty most common terms located in the title field, as identified by VOSViewer software

| Frequency range | Term             | (Count) | Term                | (Count) |
|-----------------|------------------|---------|---------------------|---------|
| 1-50            | • effect         | (45)    | • model             | (48)    |
|                 | • intervention   | (43)    | • outcome           | (44)    |
| 51-100          | • approach       | (52)    | • guideline         | (54)    |
|                 | • bias           | (67)    | • quality           | (91)    |
|                 | • clinical trial | (59)    | • reporting         | (64)    |
|                 | • comparison     | (51)    | • review            | (68)    |
|                 | • data           | (79)    |                     |         |
| 101-150         | • analysis       | (101)   | • study             | (114)   |
|                 | • method         | (102)   | • trial             | (103)   |
| 151-200         | • evidence       | (173)   |                     |         |
| 201-250         | • meta analysis  | (244)   | • systematic review | (229)   |

**Table 3** The twenty most common terms located in the abstract field, as identified by VOSViewer software

| Frequency range | Term          | (Count) | Term               | (Count) |
|-----------------|---------------|---------|--------------------|---------|
| 1-100           |               | —       |                    |         |
| 101-200         | • checklist   | (174)   | • heterogeneity    | (175)   |
|                 | • health      | (170)   | • synthesis        | (197)   |
| 201-300         | • abstract    | (204)   | • report           | (278)   |
|                 | • database    | (300)   | • search           | (264)   |
|                 | • decision    | (267)   | • test             | (287)   |
|                 | • development | (243)   | • treatment effect | (238)   |
|                 | • item        | (224)   |                    |         |
| 301-400         | • author      | (394)   | • process          | (344)   |
|                 | • estimate    | (321)   | • recommendation   | (345)   |
|                 | • journal     | (400)   | • reporting        | (339)   |
| 401-500         |               | —       |                    |         |
| 501-600         | • model       | (565)   |                    |         |
